# Supplementary material
Source: MDPI journal article supplement (https://www.mdpi.com/2311-5637/8/9/423)
Supplement: s1 [file s1 › fermentation-1843032-supplementary.pdf]

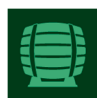

## Supplementary materials

**Table S1.** Strain selection by DPPH, ABTS+ free radical scavenging capacity and content of phenolic compounds.

| Strain     | DPPH (%)   | ABTS (%)   | Total phenolic<br>(mg gallic acid/g) |
|------------|------------|------------|--------------------------------------|
| BCRC 16000 | 87.9 ± 1.4 | 61.4 ± 1.3 | 21.8 ± 2.0                           |
| BCRC 14602 | 85.0 ± 1.7 | 61.5 ± 2.3 | 21.5 ± 1.0                           |
| BCRC 14606 | 85.6 ± 1.0 | 64.9 ± 2.8 | 23.3 ± 1.9                           |
| BCRC 14615 | 86.1 ± 2.9 | 67.6 ± 2.8 | 23.3 ± 1.8                           |
| BCRC 14634 | 86.9 ± 1.0 | 65.3 ± 1.0 | 22.3 ± 0.8                           |
| BCRC 11846 | 86.9 ± 1.7 | 66.9 ± 2.6 | 24.0 ± 1.5                           |
| BCRC 14079 | 87.2 ± 1.2 | 65.4 ± 1.5 | 23.1 ± 1.5                           |
| BCRC 14085 | 87.2 ± 1.0 | 65.3 ± 2.3 | 23.5 ± 2.0                           |
| BCRC 10696 | 88.1 ± 1.2 | 67.1 ± 1.4 | 25.2 ± 3.3                           |
| BCRC 11697 | 89.4 ± 3.6 | 76.9 ± 3.0 | 27.1 ± 1.6                           |

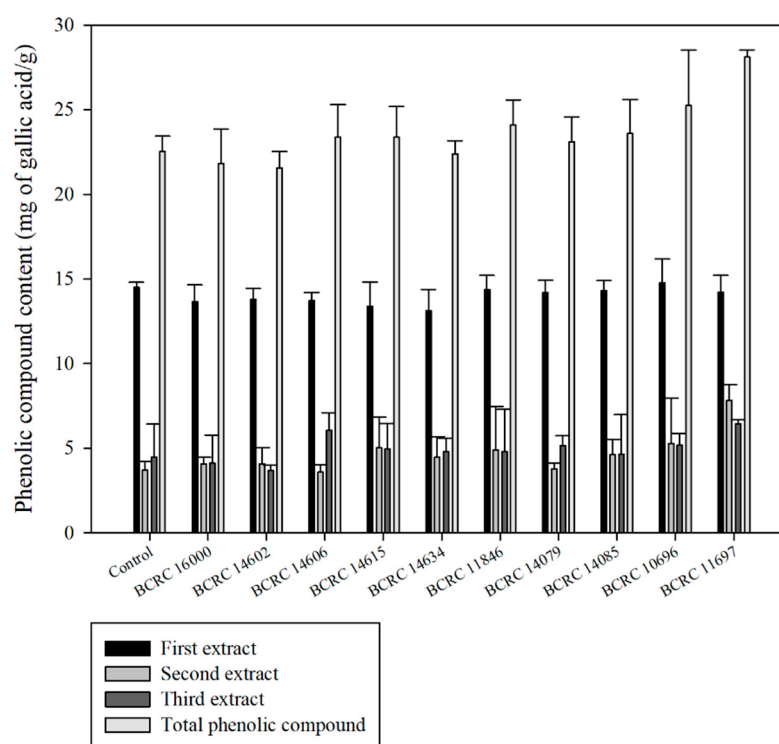**Figure S1.** Changes in phenolic compounds in Taiwan djulis fermentation with different lactic acid bacteria for 24 h. The experiments were performed in triplicates and expressed as mean ± SD.

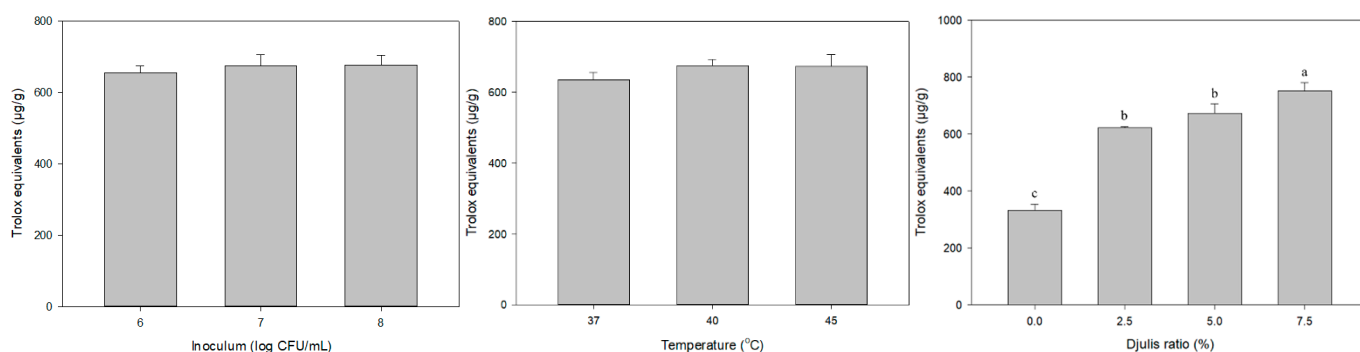

**Figure S2.** (a) DPPH free radical scavenging ability of samples at different fermentation temperatures (b) DPPH free radical scavenging ability of samples with different inoculation amounts (c) DPPH free radical scavenging ability with different proportions of Taiwan quinoa samples. The experiments were performed in triplicates and expressed as mean  $\pm$  SD.

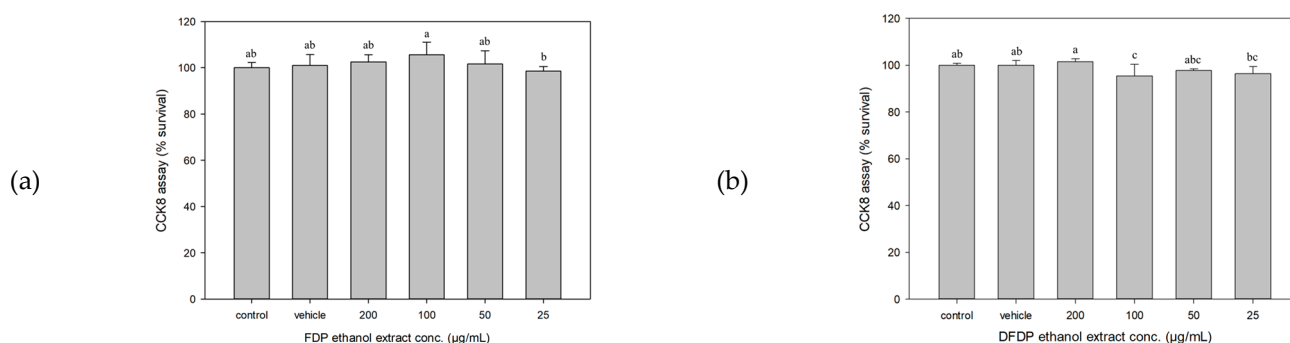

**Figure S3.** Effects of ethanol extracts from fermented dairy products (a) and ethanol extracts from fermented dairy products of Taiwan quinoa (b) on the survival of FL83B mouse liver cell lines. The experiments were performed in triplicates and expressed as mean  $\pm$  SD. Different letters indicate significant differences from each other.
